# Supplementary material for: Proteomic landscape of tunneling nanotubes reveals CD9 and CD81 tetraspanins as key regulators
Source: eLife. 2024 Sep 9;13:RP99172. doi: 10.7554/eLife.99172 (PMC11383530; doi:10.7554/eLife.99172)
Supplement: Supplementary file 8. [file elife-99172-supp8.xlsx]

## Sheet: Fig 1C
		EVPs		TNTs	TNTs
		diameter nm		diameter nm	length nm
		54.5392		77.5598	532.438
		56.5348		131.488	554.476
		64.4131		78.2318	403.063
		73.8823		56.3777	648.777
		77.2538		55.6803	194.742
		58.0687		75.678	545.658
		78.2044		62.2891	182.762
		53.6205		67.7482	393.249
		47.2559		88.4404	459.887
		53.7629
		48.4012		94.2979	702.002
		48.5195		86.6255	667.647
		83.0164		49.853	412.968
		51.4627		41.2098	220.287
		46.7		72.8979	474.712
		56.6923		84.2562	641.35
		134.704		97.5057	698.67
		44.148		85.3303	292.378
		61.4579		92.0143	912.608
		35.2787
		48.572		50.868	400.707
		56.2071		58.1048	167.834
		54.2347		68.7578	188.258
		77.6814		75.537	295.409
		60.9688		53.0879	217.314
		53.8457		51.1105	209.183
		55.5115		72.8941	404.971
		67.4466		63.1798	209.13
		74.3721		37.5723	144.337
		64.7779		46.0697	202.03
		53.3824		108.722	302.763
		65.482
		46.5634		81.6117	304.311
		48.8857		80.2785	204.606
		102.298		85.1206	456.942
		59.7447		50.869	162.261
		94.5253		46.8992	229.424
		57.4179		43.2393	173.769
		76.799		43.2601	211.23
		49.6613		88.1471	499.748
		42.3663		34.6061	139.896
		60.927		74.6004	605.937
		41.1615		46.6804	200.233
		55.3046
		66.2845
		48.5982
		60.3704
		49.3396
		83.6051
		53.893
		40.0318
		49.6613
		61.4164
		49.5843
		75.6879
		51.6233
		38.3082
		58.7665
		59.1016
		47.8985
		44.6786
		120.419
		66.7441
		47.9251
		75.4013
		56.3994
		56.5685
		62.9225
		59.7234
		69.0057
		55.3161
		70.0955
		61.4579
		63.1448
		68.6169
		61.3022
		64.3933
		26.5752
		67.4372
		69.9153
		54.6022
		45.5735
		53.3323
		65.7655
		61.6421
		66.6658
		59.1188
		53.1313
		60.4442
		47.2802
		48.2298
		48.6925
		52.0852
		42.0857
		70.5574
		60.9437
		83.0287
		50.4401
		52.8186
		70.0937
		64.1058
		51.3611
		62.6058
		68.2409
		65.1739
		61.4599
		66.7804
		53.3514
		56.9367
		55.8022
		56.5145
		73.5142
		52.4653
		9.52369
		18.0445
		74.6661
		86.0277
		78.6737
		52.5478
		61.2648
		57.8291
		64.1376
		51.6874
		63.1367
		EVPs		TNTs	TNTs
		diameter nm		diameter nm	length nm
	mean	59.7633		68.9675	371.699
	median	57.9489		70.826	303.537
	n	124		40	40

## Sheet: Fig 1E
		% GFP positive particles				EV WT	TNT WT	EV H2B-GFP	TNT H2B-GFP	EV Actin chr-GFP	TNT Actin chr-GFP	EV GFP-CD9	TNT GFP-CD9
						0	0.76	14.5	2.95652	0	38.7654	15.8462	9.19231
						0	0.084	0.986667	0.266667			15.4	11.9
						0.023	0.087	3.16	2.65333	0	59.7778	8.8	5.69412
						0.022	0.3	0.546667	1.13333	0.477778	12.6667	65.4286	5
												38	24.9
												22.8235	12.8235
			means			0.01125	0.30775	4.79833	1.75246	0.159259	37.07	27.7164	11.585
			SD			0.0129968	0.318007	6.5679	1.27178	0.275845	23.6013	20.9873	7.24862

## Sheet: Fig 3C
% of TNT-connected cells
	EXPERIMENT 1										EXPERIMENT 2										EXPERIMENT 3
	WT		CD9 KO		CD81 KO		CD9&CD81 KO				WT		CD9 KO		CD81 KO		CD9&CD81 KO				WT		CD9 KO		CD81 KO		CD9&CD81 KO
Pictures	N of cells	N of TNTs	N of cells	N of TNTs	N of cells	N of TNTs	N of cells	N of TNTs		Pictures	N of cells	N of TNTs	N of cells	N of TNTs	N of cells	N of TNTs	N of cells	N of TNTs		Pictures	N of cells	N of TNTs	N of cells	N of TNTs	N of cells	N of TNTs	N of cells	N of TNTs
1	90	33	75	21	57	17	31	8		1	35	7	45	10	39	8	44	9		1	98	29	79	12	68	27	29	0
2	49	15	69	20	99	33	65	10		2	29	11	43	23	60	24	35	10		2	77	22	51	12	44	17	42	12
3	57	26	58	13	76	30	33	2		3	21	10	82	18	29	11	29	2		3	63	21	49	8	54	9	46	4
4	77	22	63	17	65	19	59	15		4	38	14	36	6	51	8	23	4		4	43	16	55	22	84	22	69	10
5	56	13	39	12	77	22	33	6		5	30	8	48	7	67	25	28	4		5	77	32	71	23	54	23	46	5
6	51	12	61	11	75	20	23	8		6	41	14	56	9	41	14	46	4		6	97	24	53	13	62	20	40	4
7	39	17	78	22			35	10		7	46	12	63	18	21	7	37	5		7	68	21	71	20	58	15	52	7
8							52	12		8	82	22	47	9	39	2	54	4		8							19	1
9							40	10		9							47	4		9							17	6
SUM	419	138	443	116	449	141	371	81		average	322	98	420	100	347	99	343	46		average	523	165	429	110	424	133	360	49
% of TNT-connected cells	32.9356		26.1851		31.4031		21.8329			% of TNT-connected cells	30.4348		23.8095		28.5303		13.4111			% of TNT-connected cells	31.5488		25.641		31.3679		13.6111
					WT	CD9 KO	CD81 KO	CD9&CD81 KO
				MEAN	31.6397	25.2119	30.4338	16.285
				SD	1.25287	1.24457	1.64858	4.80563

## Sheet: Fig 3E
% of TNT-connected cells
	EXPERIMENT 1										EXPERIMENT 2										EXPERIMENT 3
	WT		CD9 OE		CD81 OE						WT		CD9 OE		CD81 OE						WT		CD9 OE		CD81 OE
Pictures	N of cells	N of TNTs	N of cells	N of TNTs	N of cells	N of TNTs				Pictures	N of cells	N of TNTs	N of cells	N of TNTs	N of cells	N of TNTs				Pictures	N of cells	N of TNTs	N of cells	N of TNTs	N of cells	N of TNTs
1	20	8	26	14	16	6				1	22	8	20	9	22	9				1	43	11	43	14	40	7
2	25	5	38	14	23	5				2	29	7	27	15	47	10				2	41	10	43	22	33	14
3	38	18	22	11	35	5				3	22	5	40	15	34	10				3	52	13	49	24	30	14
4	31	4	52	20	26	11				4	27	10	55	26	28	10				4	46	16	43	17	49	16
5	40	9	34	18	34	11				5	18	9	29	12	34	16				5	47	19	46	19	37	11
6	41	9	44	26	19	10				6	41	10	32	13	44	12				6	59	16	46	16	48	10
7	30	10	38	17	23	8				7	27	5	45	20	32	5				7	47	18	29	14	45	8
8	20	8	32	15	31	5				8	28	9	41	26	42	9				8	38	13	42	16	25	13
SUM	245	71	286	135	207	61				average	214	63	289	136	283	81				average	373	116	341	142	307	93
% of TNT-connected cells	28.9796		47.2028		29.4686					% of TNT-connected cells	29.4393		47.0588		28.6219					% of TNT-connected cells	31.0992		41.6422		30.2932
					WT	CD9 KO	CD81 KO
				MEAN	29.8393	45.3013	29.4612
				SD	1.11501	3.16965	0.83565

## Sheet: Fig 3F
DiD-vesicle transfer
	EXPERIMENT 1						EXPERIMENT 2						EXPERIMENT 3
	WT	CD9 KO	CD81 KO	CD9&CD81 KO			WT	CD9 KO	CD81 KO	CD9&CD81 KO			WT	CD9 KO	CD81 KO	CD9&CD81 KO
Replicates	% acceptors containing DiD-vesicles	% acceptors containing DiD-vesicles	% acceptors containing DiD-vesicles	% acceptors containing DiD-vesicles			% acceptors containing DiD-vesicles	% acceptors containing DiD-vesicles	% acceptors containing DiD-vesicles	% acceptors containing DiD-vesicles			% acceptors containing DiD-vesicles	% acceptors containing DiD-vesicles	% acceptors containing DiD-vesicles	% acceptors containing DiD-vesicles
1	29.4729	29.7912	23.5633	11.8309		1	46.3208	15.6989	19.7733	10.3446		1	25.5957	12.2259	14.2561	10.0189
2	26.2828	26.164	21.9563	12.4166		2	42.9754	15.1757	18.4209	7.47132		2	25.2391	12.5413	14.4174	10.2477
3	28.1857	26.5049	26.1474			3	44.1195	15.8019	19.39	9.47299		3	26.2069	12.0732	13.8401	10.9366
average	27.9805	27.4867	23.889	12.1237		average	44.4719	15.5588	19.1948	9.09632		average	25.6806	12.2801	14.1712	10.4011
			WT	CD9 KO	CD81 KO	CD9&CD81 KO
		MEAN	32.711	18.4419	19.085	10.5404
		SD	10.25	8.00274	4.85985	1.5185

## Sheet: Fig 3G
DiD-vesicle transfer
	EXPERIMENT 1					EXPERIMENT 2					EXPERIMENT 3
	WT	CD9 OE	CD81 OE			WT	CD9 OE	CD81 OE			WT	CD9 OE	CD81 OE
Replicates	% acceptors containing DiD-vesicles	% acceptors containing DiD-vesicles	% acceptors containing DiD-vesicles			% acceptors containing DiD-vesicles	% acceptors containing DiD-vesicles	% acceptors containing DiD-vesicles			% acceptors containing DiD-vesicles	% acceptors containing DiD-vesicles	% acceptors containing DiD-vesicles
1	33.4455	72.7829	65.4545		1	20.2712	38.5491	45.1314		1	32.2108	71.5704	56.0781
2	34.3082	71.7371	65.3659		2	20.163	36.0306	44.5291		2	33.0623	74.6962	56.2058
3	34.7856	73.9349	66.2399		3	21.7503	38.4547	45.6047		3	33.7946	73.7664	56.1564
average	34.1797	72.8183	65.6867		average	20.7281	37.6781	45.0884		average	33.0226	73.3443	56.1468
	WT	CD9 OE	CD81 OE
MEAN	29.3101	61.2803	55.6406
SD	7.45472	20.4417	10.3085

## Sheet: Fig 4B
% of TNT-connected cells
	EXPERIMENT 1														EXPERIMENT 2														EXPERIMENT 3
	WT		CD9 OE		CD9 OE + CD81 KO		CD81 OE		CD81 OE + CD9 KO						WT		CD9 OE		CD9 OE + CD81 KO		CD81 OE		CD81 OE + CD9 KO						WT		CD9 OE		CD9 OE + CD81 KO		CD81 OE		CD81 OE + CD9 KO
Pictures	N of cells	N of TNTs	N of cells	N of TNTs	N of cells	N of TNTs	N of cells	N of TNTs	N of cells	N of TNTs				Pictures	N of cells	N of TNTs	N of cells	N of TNTs	N of cells	N of TNTs	N of cells	N of TNTs	N of cells	N of TNTs				Pictures	N of cells	N of TNTs	N of cells	N of TNTs	N of cells	N of TNTs	N of cells	N of TNTs	N of cells	N of TNTs
1	49	10	59	27	37	15	28	5	21	2				1	27	8	46	18	43	23	37	6	32	9				1	37	10	39	14	46	13	28	8	37	6
2	13	2	46	17	51	26	24	8	14	6				2	31	8	42	21	41	19	42	10	29	6				2	34	10	26	20	33	13	35	12	33	7
3	30	11	56	29	38	20	34	11	29	8				3	34	10	43	15	41	17	44	13	29	6				3	27	8	39	15	29	16	26	7	29	6
4	18	7	42	21	26	12	30	11	36	12				4	32	13	38	25	22	13	28	11	35	5				4	28	8	35	19	32	15	25	4	34	5
5	39	12	47	22	40	21	28	11	38	7				5	34	11	41	21	28	17	33	9	33	6				5	27	8	41	14	24	14	41	14	26	5
6	28	13	45	21	42	17	37	10	41	9				6	34	6	57	25	23	14	18	9	25	7				6	42	10	29	11	45	28	23	6	39	6
7	51	13	45	14	33	22	30	6	45	6				7	35	11	52	19	27	10	22	5	21	3				7	36	9	38	11	27	10	27	9	34	7
8	34	13	35	17	46	25	28	12	30	6				8	30	5	40	22	40	14	34	10	20	4				8	36	9	37	14			42	12	36	6
SUM	262	81	375	168	313	158	239	74	254	56				SUM	257	72	359	166	265	127	258	73	224	46				SUM	267	72	284	118	236	109	247	72	268	48
% of TNT-connected cells	30.916		44.8		50.4792		30.9623		22.0472					% of TNT-connected cells	28.0156		46.2396		47.9245		28.2946		20.5357					% of TNT-connected cells	26.9663		41.5493		46.1864		29.1498		17.9104
					WT	CD9 OE	CD9 OE + CD81 KO	CD81 OE	CD81 OE + CD9 KO
				MEAN	28.6326	44.1963	48.1967	29.4689	20.1645
				SD	2.04589	2.4027	2.1593	1.36221	2.09324

## Sheet: Fig 4C
DiD-vesicle transfer
	EXPERIMENT 1						EXPERIMENT 2								EXPERIMENT 3
	WT	CD9 OE	CD9 OE + CD81 KO	CD81 OE	CD81 OE + CD9 KO			WT	CD9 OE	CD9 OE + CD81 KO	CD81 OE	CD81 OE + CD9 KO				WT	CD9 OE	CD9 OE + CD81 KO	CD81 OE	CD81 OE + CD9 KO
Replicates	% acceptors containing DiD-vesicles	% acceptors containing DiD-vesicles	% acceptors containing DiD-vesicles	% acceptors containing DiD-vesicles	% acceptors containing DiD-vesicles		Replicates	% acceptors containing DiD-vesicles	% acceptors containing DiD-vesicles	% acceptors containing DiD-vesicles	% acceptors containing DiD-vesicles	% acceptors containing DiD-vesicles			Replicates	% acceptors containing DiD-vesicles	% acceptors containing DiD-vesicles	% acceptors containing DiD-vesicles	% acceptors containing DiD-vesicles	% acceptors containing DiD-vesicles
1	20.7012	70.3847	82.885	71.7529	35.8338		1	22.7285	63.0032	86.4925	59.4168	43.6598			1	36.5542	87.7365	93.1103	88.1065	57.8535
2	20.4598	69.0104	83.0399	71.2539	35.932		2	20.6517	63.9862	88.0195	58.0397	40.4478			2	35.8016	88.1536	92.7935	88.4612	58.6733
3	20.1766	69.9599	82.5965	71.7482	35.0325		3	21.0461	63.9668	87.5807	60.1837	43.3006			3	36.8042	87.9723	93.0601	88.4379	57.7122
average	20.4459	69.785	82.8405	71.585	35.5994		average	21.4754	63.6521	87.3642	59.2134	42.4694			average	36.3867	87.9541	92.988	88.3352	58.0797
	WT	CD9 OE	CD9 OE + CD81 KO	CD81 OE	CD81 OE + CD9 KO
MEAN	26.1027	73.7971	87.7309	73.0445	45.3828
SD	8.92109	12.638	2.79768	14.6157	11.5198

## Sheet: Fig5B
% of TNT-connected cells
	EXPERIMENT 1													EXPERIMENT 2													EXPERIMENT 3
	NT			CD46 AB			CD9 AB							NT			CD46 AB			CD9 AB							NT			CD46 AB			CD9 AB
Pictures	N of cells	N of TNTs	% of TNT-connected cells	N of cells	N of TNTs	% of TNT-connected cells	N of cells	N of TNTs	% of TNT-connected cells				Pictures	N of cells	N of TNTs	% of TNT-connected cells	N of cells	N of TNTs	% of TNT-connected cells	N of cells	N of TNTs	% of TNT-connected cells				Pictures	N of cells	N of TNTs	% of TNT-connected cells	N of cells	N of TNTs	% of TNT-connected cells	N of cells	N of TNTs	% of TNT-connected cells
1	116	43	37.069	112	33	29.4643	135	68	50.3704				1	92	31	33.6957	111	22	19.8198	90	37	41.1111				1	87	28	32.1839	79	19	24.0506	60	36	60
2	164	33	20.122	169	45	26.6272	110	37	33.6364				2	118	31	26.2712	73	30	41.0959	129	62	48.062				2	97	31	31.9588	89	34	38.2022	90	30	33.3333
3	103	25	24.2718	102	30	29.4118	54	27	50				3	100	36	36	98	39	39.7959	168	56	33.3333				3				115	37	32.1739	83	32	38.5542
4	93	29	31.1828	86	34	39.5349	84	24	28.5714				4	149	41	27.5168	100	31	31							4
AVERAGE			28.1614			31.2595			40.6445							30.8709			32.9279			40.8355							32.0713			31.4756			43.9625
					NT	CD46 AB	CD9 AB
			MEAN		30.3679	31.8877	41.8142
			SD		2.00292	0.907316	1.86296

## Sheet: Fig5C
DiD-vesicle transfer
	EXPERIMENT 1				EXPERIMENT 2				EXPERIMENT 3
	CTR AB	CD9 AB			CTR AB	CD9 AB			CTR AB	CD9 AB
Replicates	% acceptors containing DiD-vesicles	% acceptors containing DiD-vesicles			% acceptors containing DiD-vesicles	% acceptors containing DiD-vesicles			% acceptors containing DiD-vesicles	% acceptors containing DiD-vesicles
1	53.57	31.25		1	41.67	33.33		1	11.76	50
2	7.69	55.56		2	27.27	64.29		2	46.15	11.11
3	75	41.67		3	0	42.86		3	25	52.38
4	14.29	42.86		4	11.11	8.33		4	20	40
5	15.79	62.5		5	53.33	15.38		5	33.33	46.43
6	25	26.32		6	10	38.46		6	22.73	35
7	25	33.33		7	15.38	31.25		7	31.25	12.5
average	30.9057	41.9271		average	22.68	33.4143		average	27.1743	35.3457
	CTR AB	CD9 AB
MEAN	26.92	36.8957
SD	4.11875	4.46308

[truncated: 19 more sheets: Fig5E, Fig5F, Fig 6G, Fig 7A, Fig 7C, Fig S1D, Fig S1E, Fig S1G, Fig S1H, Fig S3C, Fig S5B, Fig S5D, Fig S5F, Fig S6B, Fig S6C, Fig S6E, Fig S6F, Fig S7A, Fig S7B]
